# Supplementary material for: Histone H3.3 deposition in seed is essential for the post-embryonic developmental competence in Arabidopsis
Source: PubMed Central journal article supplement (PMC9747979; doi:10.1038/s41467-022-35509-6), 2022-12-13
Supplement: 41467_2022_35509_MOESM1_ESM.pdf [file 41467_2022_35509_MOESM1_ESM.pdf]

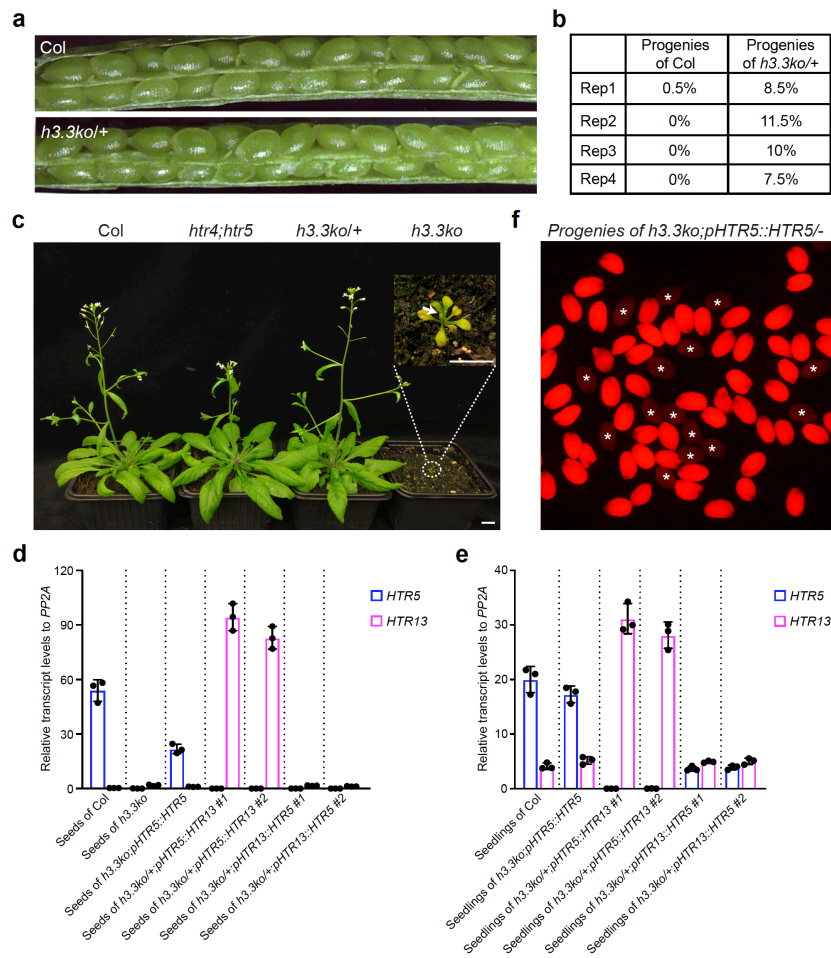

### Supplementary Figure 1. *h3.3ko* phenotypes and expression analysis of *HTR5* and *HTR13* in transgenic lines.

**a.** Seed development of Col and *h3.3ko/+* (*htr4/htr4;htr5/htr5;htr8/+*).

**b.** Percentages of ungerminated seeds after 7 days imbibition, 200 seeds were scored in each replicate.

**c.** The developmental phenotype of Col, *htr4/htr4;htr5/htr5*, *h3.3ko/+* (*htr4/htr4;htr5/htr5;htr8/+*) and *h3.3ko* (*htr4/htr4;htr5/htr5;htr8/htr8*) at bolting stage. An inflorescence-like structure on *h3.3ko* is indicated with an arrow. Scale bars=1cm.

**d and e.** Relative transcript levels of *HTR5* and *HTR13* in the mature seeds (d) or 7-day-old seedlings (e) of indicated lines. The *HTR5* amplification primers were designed to only amplify the WT but not Crispr-mutated *HTR5*. Primers amplifying *HTR5* and *HTR13* were tested to have similar amplification efficiency. Values are means  $\pm$  SD of three biological replicates. *PP2A* was used as an endogenous control for normalization.

**f.** Selection of *h3.3ko* seeds from *h3.3ko;pHTR5::HTR5/-* progenies. *h3.3ko* seeds without the complementation construct (mCherry signals) are indicated with asterisks.

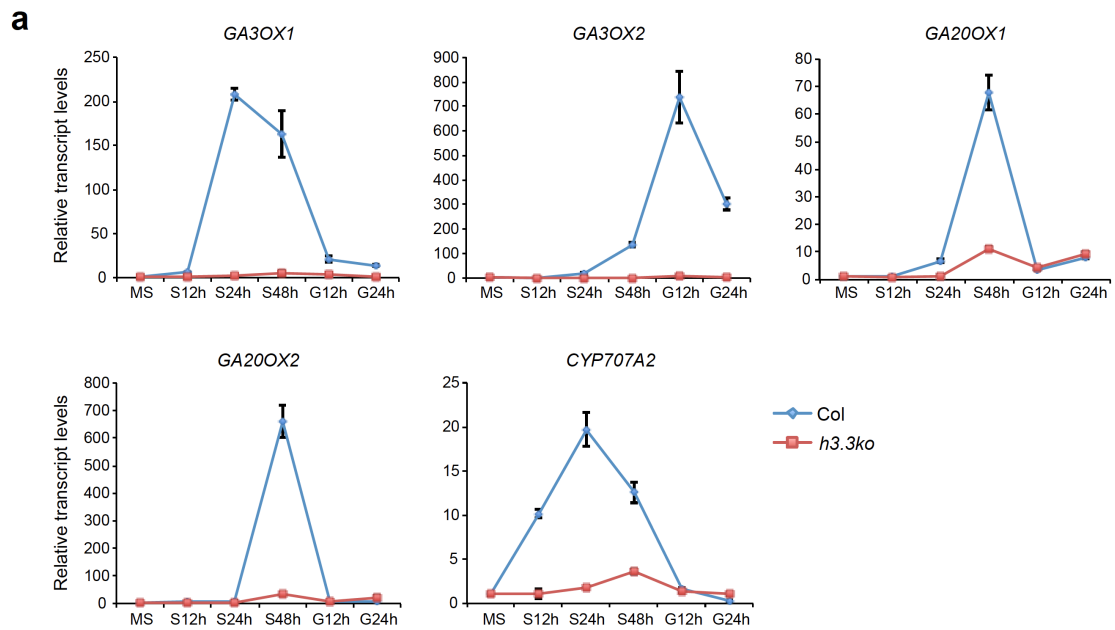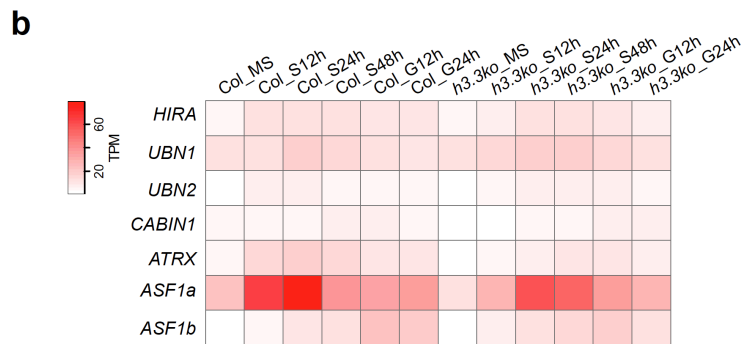

**Supplementary Figure 2. Gene expression analysis during imbibition in Col and *h3.3ko*.**

**a.** Transcript levels of *GA3OX1*, *GA3OX2*, *GA20OX1*, *GA20OX2* and *CYP707A2* during imbibition determined by RT-qPCR in Col and *h3.3ko*. Values are means  $\pm$  SD of three biological replicates. *PP2A* was used as an endogenous control for normalization.

**b.** Heatmap showing the expression of H3.3 deposition chaperones during imbibition determined by RNA-seq in Col and *h3.3ko*. Values are means of three biological replicates.

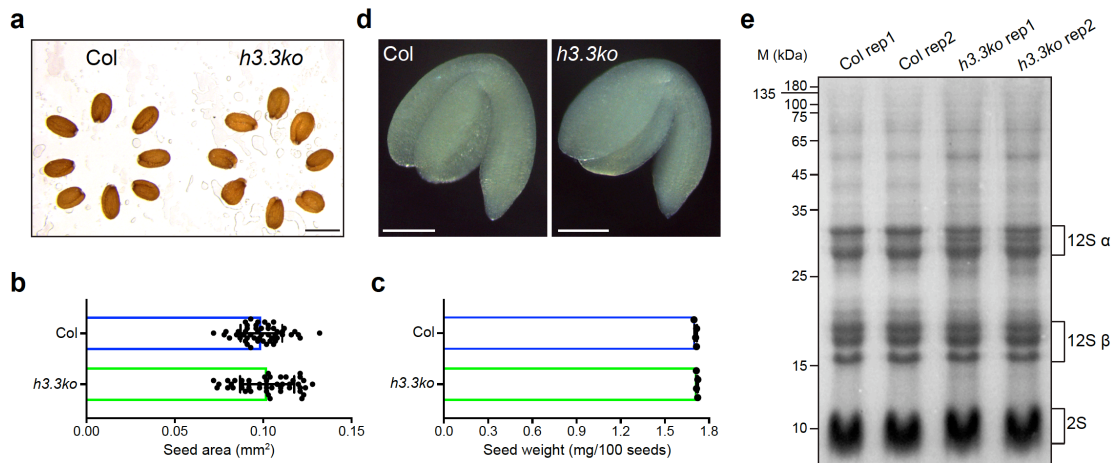

### Supplementary Figure 3. *h3.3ko* embryo is morphologically intact.

**a.** Representative mature seeds of Col and *h3.3ko*. Scale bar=0.5mm. Three independent experiments were performed with similar results.

**b and c.** Seed size (b) and 100-seed weight (c) of Col and *h3.3ko*. 50 and 47 mature seeds were measured for the size of Col and *h3.3ko* respectively. Four replicates were measured for seed weight. Values are means  $\pm$  SD.

**d.** Representative mature embryo of Col and *h3.3ko*. Scale bars=0.1mm. Twenty mature embryos of Col or *h3.3ko* were dissected with similar results.

**e.** Total proteins extracted from the same number of Col and *h3.3ko* mature seeds. 12S  $\alpha$  and 12S  $\beta$  globulins and 2S albumins were indicated. Three independent experiments were performed with similar results.

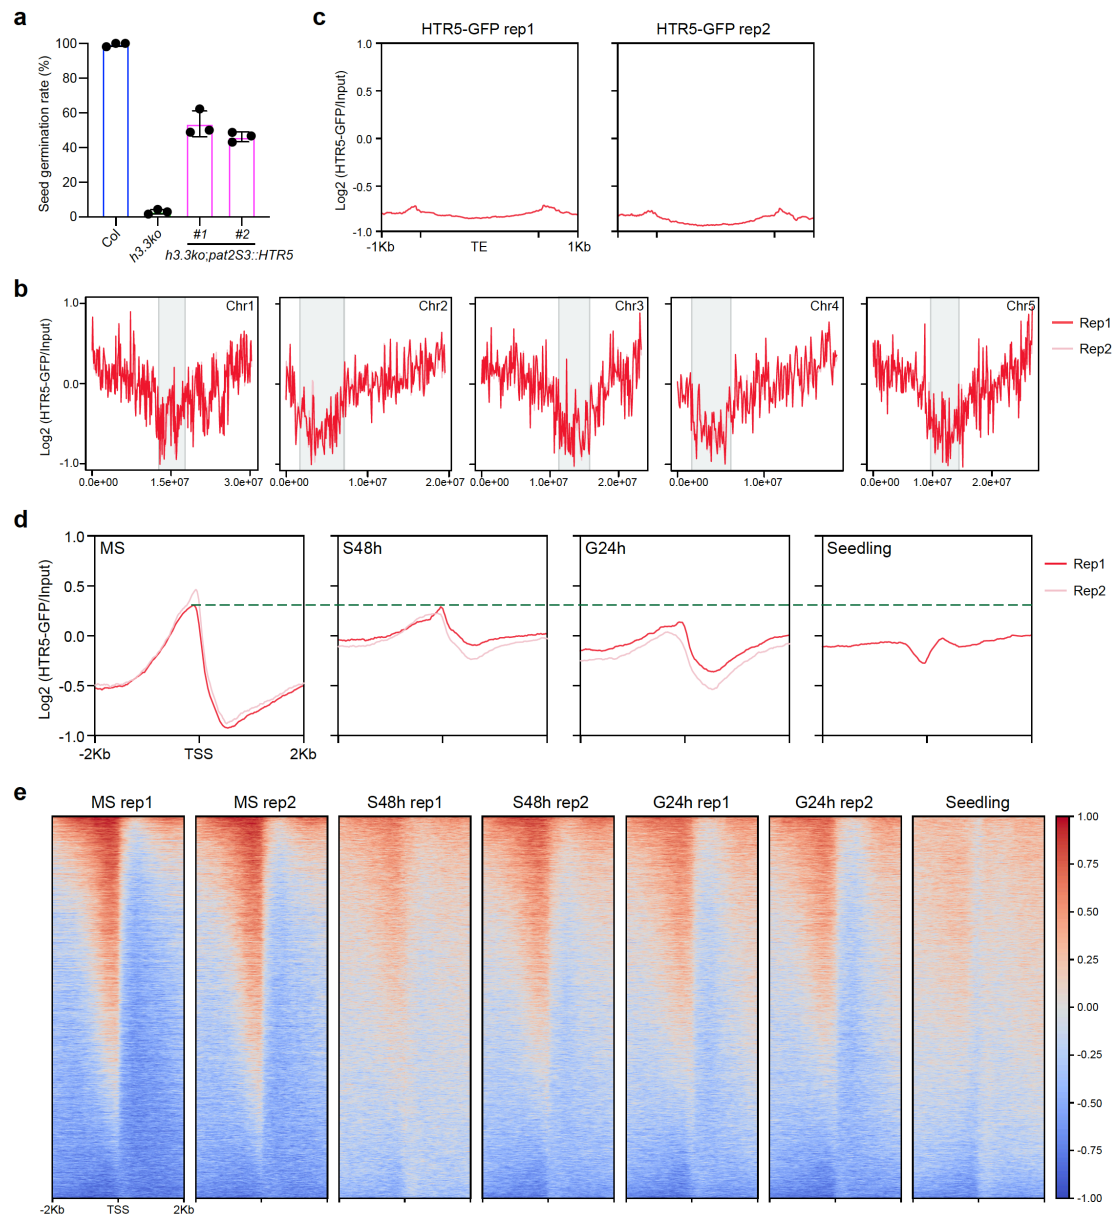

### Supplementary Figure 4. HTR5-GFP distribution in mature seeds.

**a.** Percentages of *h3.3ko;pat2S3::HTR5* seeds that germinated within 1 month of imbibition. Values are means  $\pm$  SD of three biological replicates. At least 40 seeds were assessed for each replicate.

**b.** HTR5-GFP ChIP-seq signals in mature seeds over *Arabidopsis* chromosomes. Signals were calculated in 100kb bins. Pericentromeric heterochromatin regions are indicated with grey shading.

**c.** Metaplot of HTR5-GFP ChIP-seq signals in mature seeds over TEs.

**d.** Metaplot of HTR5-GFP ChIP-seq signals over all TSS regions in mature seeds, during imbibition, and in the 10-day-old seedling.

**e.** Heatmap of HTR5-GFP ChIP-seq signals over all TSS regions in mature seeds, during imbibition, and in the 10-day-old seedling.

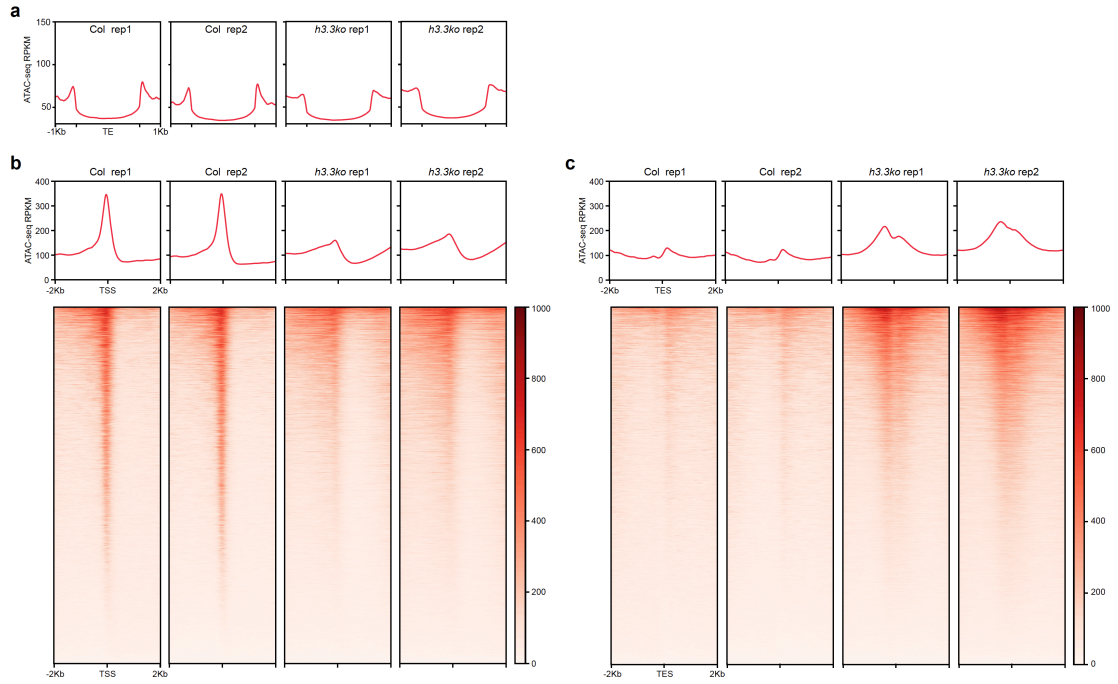

**Supplementary Figure 5. Chromatin accessibility over TEs and genes in mature Col and *h3.3ko* seeds.**

- a. Metaplot of ATAC-seq signals in Col and *h3.3ko* mature seeds over TEs.
- b. Metaplot and heatmap of ATAC-seq signals in Col and *h3.3ko* mature seeds over all TSS regions.
- c. Metaplot and heatmap of ATAC-seq signals in Col and *h3.3ko* mature seeds over all TES regions.

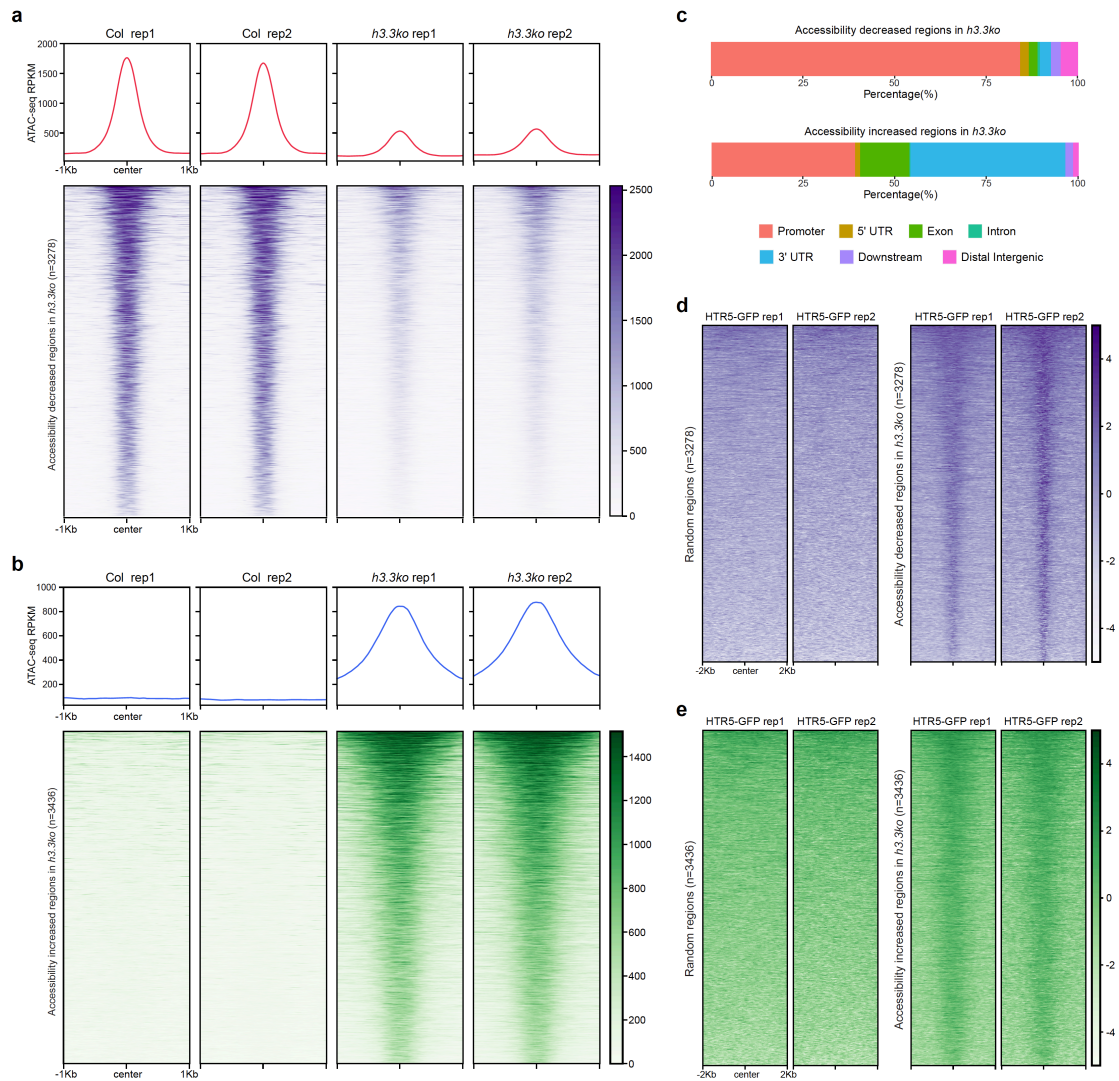

**Supplementary Figure 6. Chromatin accessibility and HTR5-GFP enrichment over accessibility decreased and increased regions in mature *h3.3ko* seeds compared with Col.**

**a and b.** Metaplot and heatmap of ATAC-seq signals in Col and *h3.3ko* mature seeds over accessibility significantly decreased (a) and increased (b) regions in mature *h3.3ko* seeds compared with Col.

**c.** Genomic distribution of accessibility significantly decreased and increased regions in mature *h3.3ko* seeds compared with Col.

**d and e.** Heatmap of HTR5-GFP signals in mature seeds over accessibility significantly decreased (d) and increased (e) regions in mature *h3.3ko* seeds compared with Col. HTR5-GFP signals over randomly selected regions are served as control.

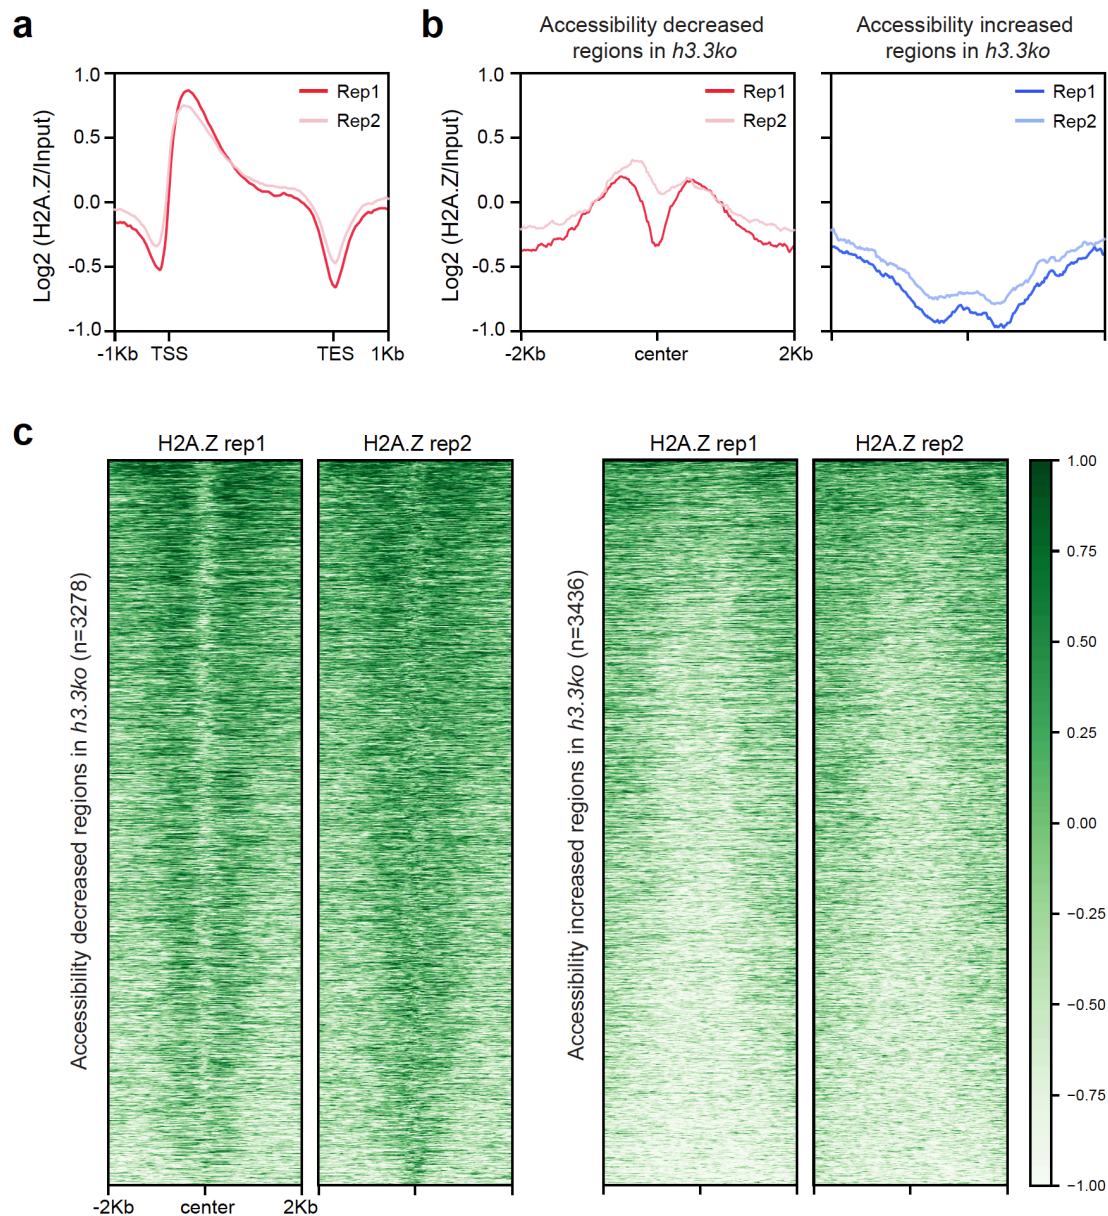

**Supplementary Figure 7. H2A.Z distribution in mature seeds.**

**a.** Metaplot of H2A.Z ChIP-seq signals in mature seeds over all genes.

**b.** Metaplot of H2A.Z ChIP-seq signals in mature seeds over accessibility significantly decreased and increased regions in mature *h3.3ko* seeds compared with Col.

**c.** Heatmap of H2A.Z ChIP-seq signals in mature seeds over accessibility significantly decreased and increased regions in mature *h3.3ko* seeds compared with Col.

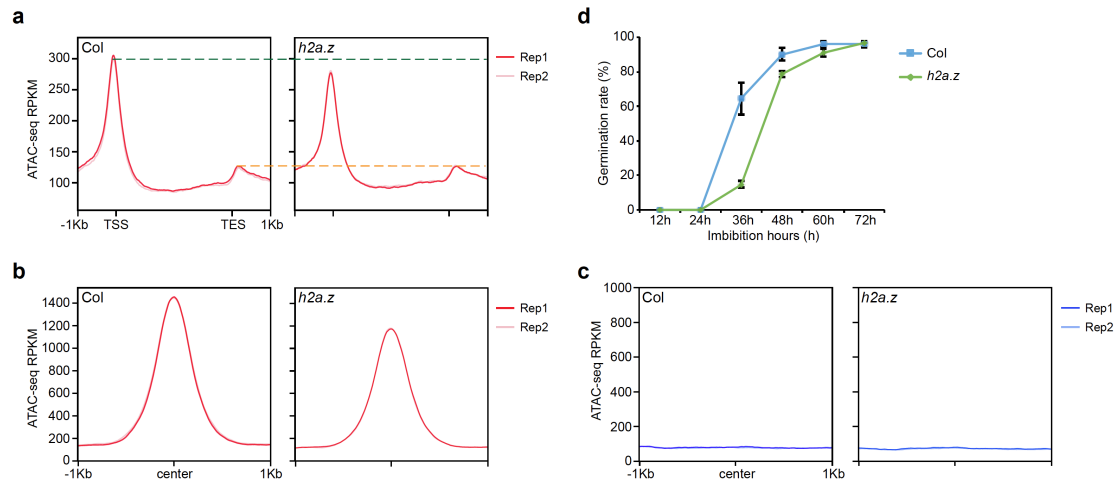

**Supplementary Figure 8. Chromatin accessibility analysis in *h2a.z* mutant.**

**a.** Metaplot of ATAC-seq signals in Col and *h2a.z* mature seeds over all genes.

**b and c.** Metaplot of ATAC-seq signals in Col and *h2a.z* mature seeds over accessibility significantly decreased (b) and increased (c) regions in mature *h3.3ko* seeds compared with Col.

**d.** Germination rates of Col and *h2a.z*. Values are means  $\pm$  SD of three biological replicates. 196 seeds were assessed in each replicate.



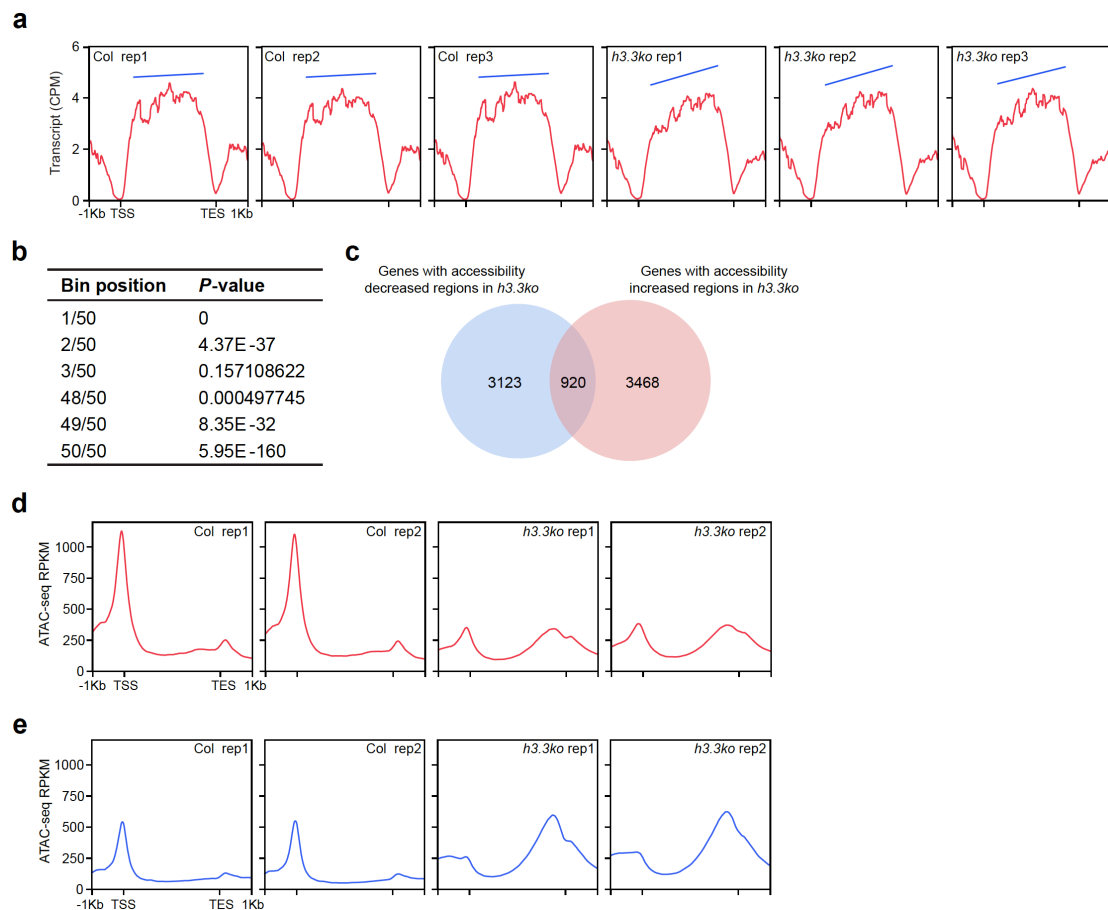

**Supplementary Figure 9. Altered chromatin accessibility in *h3.3ko* affects transcription.**

**a.** Metaplot of transcripts in Col and *h3.3ko* mature seeds over all genes in three biological replicates.

**b.** Significance analysis of difference between transcript levels in Col and *h3.3ko* mature seeds around the 5' and 3' gene ends. Transcripts on genes were divided into 50 bins from the 5' to 3'. *P*-values of the first (5') and last (3') three bins were shown, *P*-values were calculated with the two-sided Wilcoxon test.

**c.** Venn diagrams of accessibility decreased and increased region associated genes in mature *h3.3ko* seeds.

**d and e.** Metaplot of ATAC-seq signals in Col and *h3.3ko* mature seeds over genes with accessibility significantly decreased (d) and increased (e) regions in mature *h3.3ko* seeds.

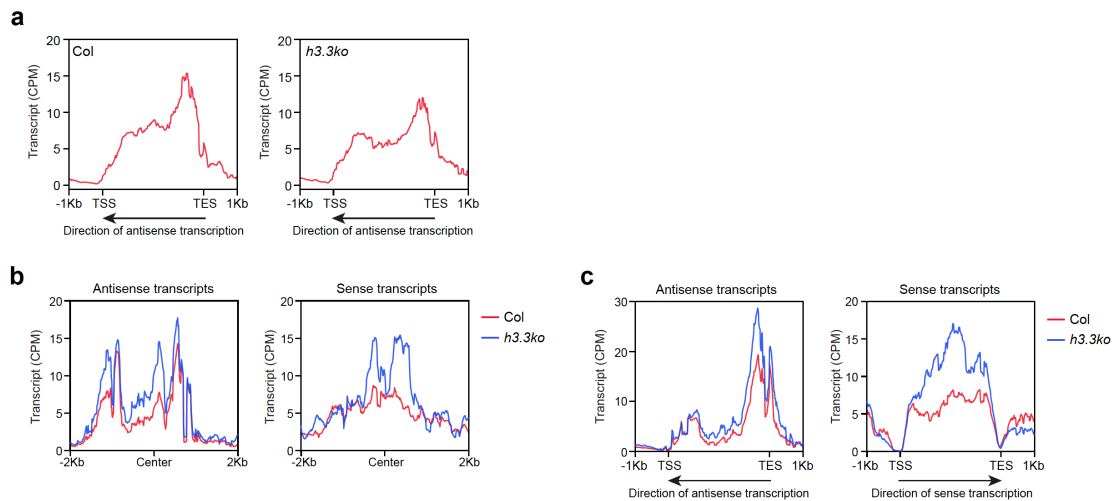

**Supplementary Figure 10. Antisense transcripts analysis in mature *h3.3ko* seeds.**

**a.** Metaplot of antisense transcripts in Col and *h3.3ko* mature seeds over all genes. The profiles were generated after merging three biological replicates.

**b.** Metaplot of sense and antisense transcripts in Col and *h3.3ko* mature seeds over accessibility significantly increased regions in mature *h3.3ko* seeds compared with Col. The profiles were generated after merging three biological replicates.

**c.** Metaplot of sense and antisense transcripts in Col and *h3.3ko* mature seeds over genes with accessibility significantly increased regions in mature *h3.3ko* seeds. The profiles were generated after merging three biological replicates.

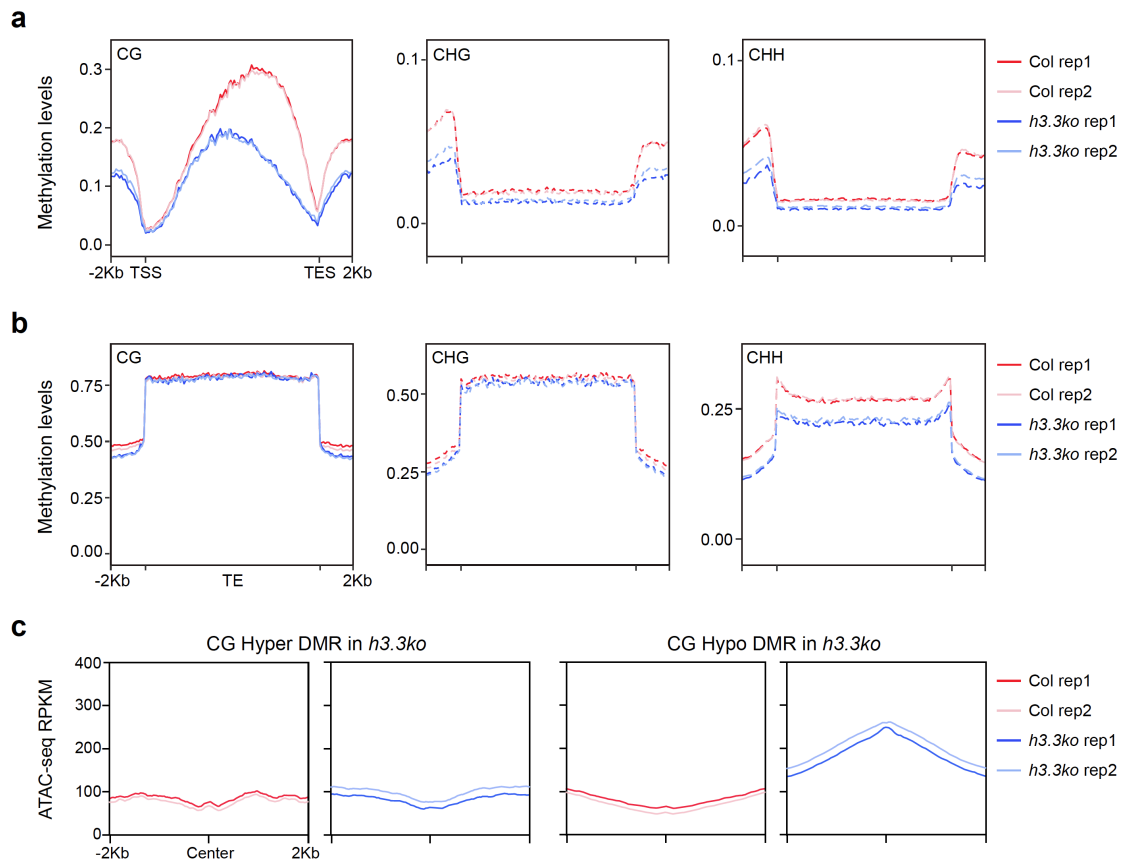

**Supplementary Figure 11. DNA methylation changes in mature *h3.3ko* seeds.**

**a and b.** Metaplot of DNA methylation levels in Col and *h3.3ko* mature seeds over all genes (a) or TEs (b).

**c.** Metaplot of ATAC-seq signals in Col and *h3.3ko* mature seeds over hyper and hypo CG methylation regions in mature *h3.3ko* seeds compared with Col.

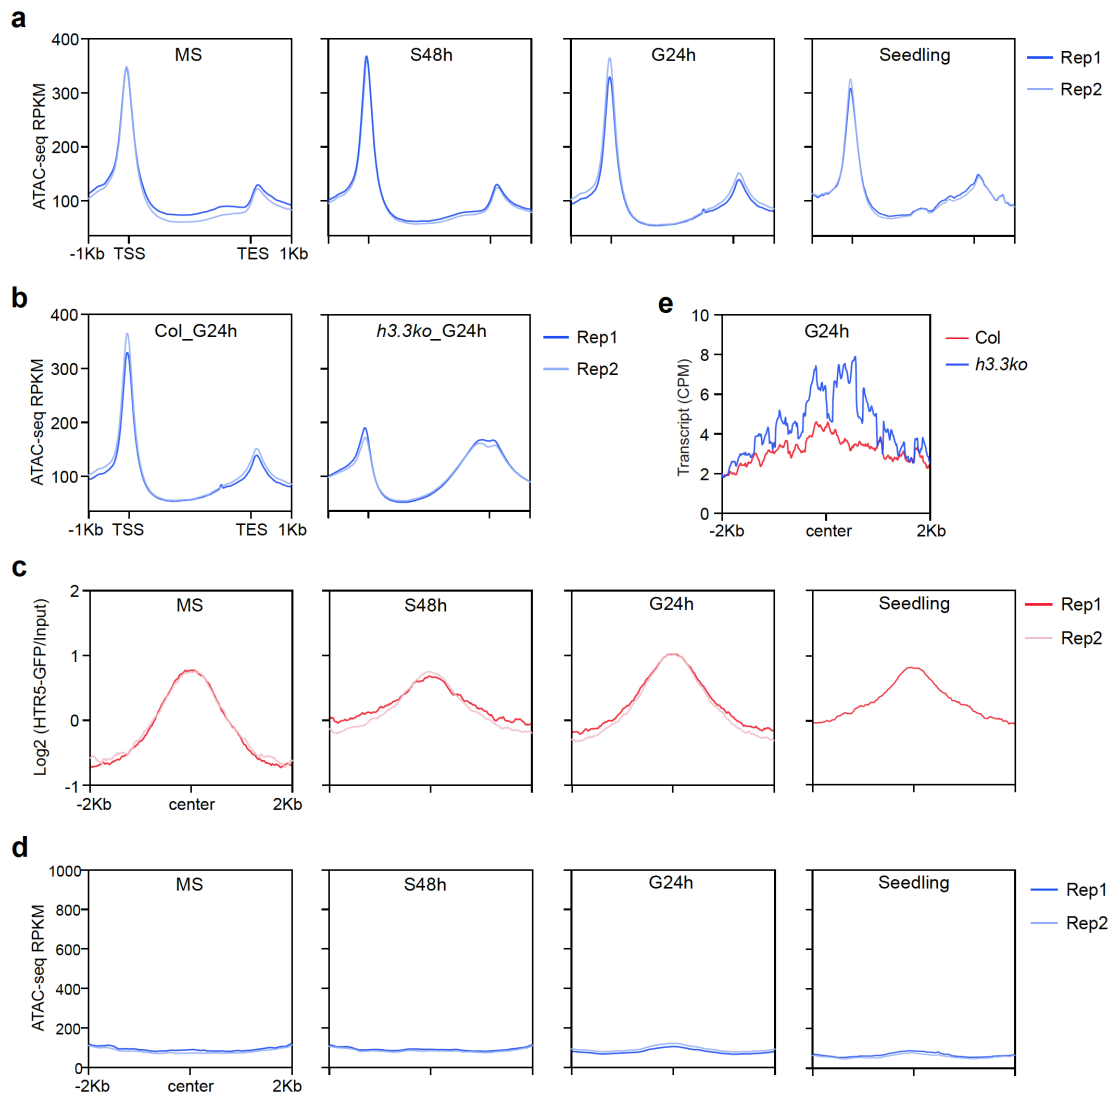

**Supplementary Figure 12. Chromatin accessibility analyses during germination and in seedlings.**

**a.** Metaplot of ATAC-seq signals in mature seeds, during germination and in 10-day-old seedlings over all genes.

**b.** Metaplot of ATAC-seq signals in imbibed Col and *h3.3ko* seeds over all genes.

**c and d.** Metaplot of HTR5-GFP ChIP-seq (c) and ATAC-seq (d) signals in mature seeds, during germination and in 10-day-old seedlings over accessibility significantly increased regions in mature *h3.3ko* seeds compared with Col.

**e.** Metaplot of transcripts in imbibed Col and *h3.3ko* seeds over accessibility significantly increased regions in mature *h3.3ko* seeds compared with Col. The profiles were generated after merging three biological replicates.

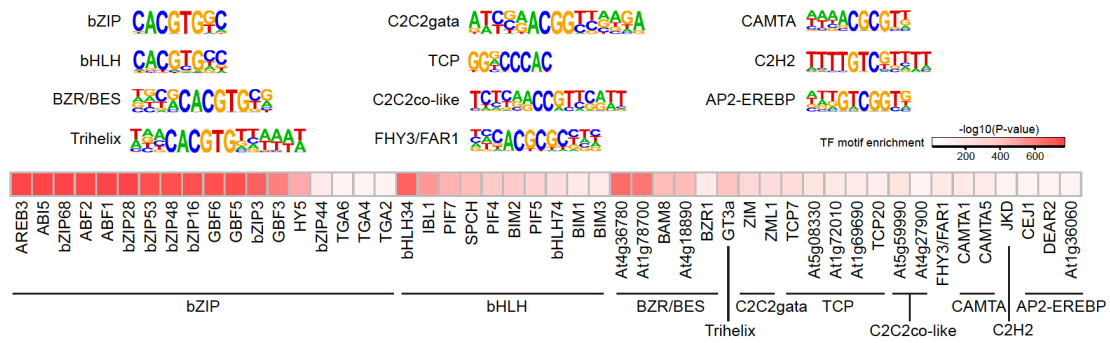

**Supplementary Figure 13. Identification of transcription factor binding motifs of at accessibility decreased regions in mature *h3.3ko* seeds compared with Col.**

Top 50 transcription factors with their binding motifs enriched in accessibility significantly decreased regions in mature *h3.3ko* seeds compared with Col. The representative DNA binding motifs in each class are shown.

**Supplementary Table 1. Numbers of mapped reads in RNA-seq, ChIP-seq, ATAC-seq and BS-seq.**

| <b>Experiment</b>              | <b>Sample</b> | <b>Number of mapped reads</b> |
|--------------------------------|---------------|-------------------------------|
| <b>RNA-seq</b>                 | Col_MS_1      | 42,771,255                    |
|                                | Col_MS_2      | 43,522,042                    |
|                                | Col_MS_3      | 45,321,666                    |
|                                | Col_S12h_1    | 42,769,670                    |
|                                | Col_S12h_2    | 42,068,778                    |
|                                | Col_S12h_3    | 42,588,357                    |
|                                | Col_S24h_1    | 42,717,146                    |
|                                | Col_S24h_2    | 41,514,410                    |
|                                | Col_S24h_3    | 41,100,658                    |
|                                | Col_S48h_1    | 42,784,633                    |
|                                | Col_S48h_2    | 41,746,446                    |
|                                | Col_S48h_3    | 42,609,198                    |
|                                | Col_G12h_1    | 41,908,169                    |
|                                | Col_G12h_2    | 42,843,680                    |
|                                | Col_G12h_3    | 41,208,944                    |
|                                | Col_G24h_1    | 41,146,343                    |
|                                | Col_G24h_2    | 41,493,850                    |
|                                | Col_G24h_3    | 42,656,327                    |
|                                | h3.3ko_MS_1   | 44,185,509                    |
|                                | h3.3ko_MS_2   | 43,951,937                    |
|                                | h3.3ko_MS_3   | 45,228,773                    |
|                                | h3.3ko_S12h_1 | 43,165,504                    |
|                                | h3.3ko_S12h_2 | 43,683,708                    |
|                                | h3.3ko_S12h_3 | 41,479,732                    |
|                                | h3.3ko_S24h_1 | 41,637,947                    |
|                                | h3.3ko_S24h_2 | 42,819,977                    |
|                                | h3.3ko_S24h_3 | 41,955,739                    |
|                                | h3.3ko_S48h_1 | 43,223,466                    |
|                                | h3.3ko_S48h_2 | 42,764,922                    |
|                                | h3.3ko_S48h_3 | 41,801,537                    |
|                                | h3.3ko_G12h_1 | 42,449,438                    |
|                                | h3.3ko_G12h_2 | 42,335,758                    |
|                                | h3.3ko_G12h_3 | 43,739,988                    |
|                                | h3.3ko_G24h_1 | 42,159,645                    |
|                                | h3.3ko_G24h_2 | 42,198,128                    |
| h3.3ko_G24h_3                  | 42,917,352    |                               |
| <b>Strand-specific RNA-seq</b> | Col_MS_1      | 46,625,958                    |
|                                | Col_MS_2      | 40,150,566                    |
|                                | Col_MS_3      | 43,471,932                    |
|                                | h3.3ko_MS_1   | 48,275,889                    |
|                                | h3.3ko_MS_2   | 44,333,111                    |

|                          |                        |            |
|--------------------------|------------------------|------------|
|                          | h3.3ko_MS_3            | 48,006,291 |
| <b>ChIP-seq</b>          | HTR5-GFP_MS_1_input    | 10,310,971 |
|                          | HTR5-GFP_MS_2_input    | 8,658,993  |
|                          | HTR5-GFP_MS_1_GFP_IP   | 11,717,702 |
|                          | HTR5-GFP_MS_2_GFP_IP   | 5,932,850  |
|                          | HTR5-GFP_MS_1_H2A.Z_IP | 25,970,238 |
|                          | HTR5-GFP_MS_2_H2A.Z_IP | 31,166,506 |
|                          | HTR5-GFP_S48h_1_input  | 7,596,469  |
|                          | HTR5-GFP_S48h_2_input  | 13,465,070 |
|                          | HTR5-GFP_S48h_1_GFP_IP | 8,036,824  |
|                          | HTR5-GFP_S48h_2_GFP_IP | 9,416,504  |
|                          | HTR5-GFP_G24h_1_input  | 10,607,918 |
|                          | HTR5-GFP_G24h_2_input  | 12,504,971 |
|                          | HTR5-GFP_G24h_1_GFP_IP | 10,861,953 |
|                          | HTR5-GFP_G24h_2_GFP_IP | 9,025,282  |
| <b>ATAC-seq (h3.3ko)</b> | Col_MS_1               | 10,308,725 |
|                          | Col_MS_2               | 15,788,642 |
|                          | Col_S48h_1             | 16,907,549 |
|                          | Col_S48h_2             | 14,210,358 |
|                          | Col_G24h_1             | 12,656,074 |
|                          | Col_G24h_2             | 10,503,110 |
|                          | Col_Seedling_1         | 10,672,105 |
|                          | Col_Seedling_2         | 9,847,754  |
|                          | h3.3ko_MS_1            | 11,563,748 |
|                          | h3.3ko_MS_2            | 11,702,975 |
|                          | h3.3ko_G24h_1          | 17,519,596 |
|                          | h3.3ko_G24h_2          | 16,846,128 |
| <b>ATAC-seq (h2a.z)</b>  | Col_MS_1               | 7,213,265  |
|                          | Col_MS_2               | 11,247,954 |
|                          | h2a.z_MS_1             | 11,146,880 |
|                          | h2a.z_MS_2             | 13,746,335 |
| <b>BS-seq</b>            | Col_MS_1               | 13,444,622 |
|                          | Col_MS_2               | 11,882,854 |
|                          | h3.3ko_MS_1            | 7,148,130  |
|                          | h3.3ko_MS_2            | 9,620,680  |

---

**Supplementary Table 2. Primers used in this study.**

| <b>Experiment</b>          | <b>Primer (5' to 3')</b>                            |
|----------------------------|-----------------------------------------------------|
| <b>RT-qPCR</b>             |                                                     |
| <b><i>HTR5</i></b>         | TCGTAAGTCTACTGGAGGAAAG<br>ACGCAAGTCAGTCTTGAAATCC    |
| <b><i>HTR13</i></b>        | GAAATCCACAGGAGGCAAAG<br>ACTTCCTGATCTCTCTCAAGGC      |
| <b><i>GA3OX1</i></b>       | CCTCAACTACTGCGATATCGTTG<br>CCATTCAATGTCTTCTTCGCTG   |
| <b><i>GA3OX2</i></b>       | TCCACGATTTCCGTAAACTCTG<br>AATGCGAACCACATCAACTTGG    |
| <b><i>GA20OX1</i></b>      | ATACTTTTCATGGCTCTATCGAAC<br>AGCTCTCTCGGTGGCGTCACTAC |
| <b><i>GA20OX2</i></b>      | TTCATCGATCTCTCAAGCCAAG<br>TGCATAGCCACAACCTCTCACC    |
| <b><i>CYP707A2</i></b>     | ATGGTGGTTGCACTGGAAAGAG<br>TGCTCACTAACACCATTTCGAGC   |
| <b><i>PP2A</i></b>         | TCGGATGACGATTCTTCGTGCAG<br>CTTGGTCGACTATCGGAATGAGAG |
| <b>ChIP-qPCR</b>           |                                                     |
| <b><i>AT1G36730_I</i></b>  | GTCTGAACAGGCTTCTCTCTTTC<br>TCGTGATGTCCTCCTCAAACGC   |
| <b><i>AT1G36730_II</i></b> | CATCGAGTGGCTCCAGAATGC<br>AAGACGCACACTGAACCAGACAG    |
| <b><i>AT3G44110_I</i></b>  | GCGAAAAGATGTTCCGGTAGAGG<br>ATCAGGATGATTCTTGATAGCGG  |
| <b><i>AT3G44110_II</i></b> | GTTTGGGCTCCAACCAATTTGTC<br>GTTTCGATGTTCCACCGAAGTGGG |
| <b><i>AT5G22000_I</i></b>  | GACGACGTCGGAGGGGCATTTG<br>AGTAGAAGGATCGCTTTCGCAG    |
| <b><i>AT5G22000_II</i></b> | ATGTCTCTGAAAATCACACTCCTG<br>CAGAACCAGTCGCACATGTTTC  |
