# Supplementary material for: Histone H3.3 deposition in seed is essential for the post-embryonic developmental competence in Arabidopsis
Source: PubMed Central journal article supplement (PMC9747979; doi:10.1038/s41467-022-35509-6), 2022-12-13
Supplement: 41467_2022_35509_MOESM3_ESM.pdf [file 41467_2022_35509_MOESM3_ESM.pdf]

**Title:** Supplementary Data 1.

**Description:** Transcript level decreased and increased genes in *h3.3ko*.

**Title:** Supplementary Data 2.

**Description:** Accessibility significantly decreased and increased regions in *h3.3ko* mature seeds.

**Title:** Supplementary Data 3.

**Description:** Genes associated with accessibility significantly decreased and increased regions in *h3.3ko* mature seeds.

**Title:** Supplementary Data 4.

**Description:** Enriched TF binding motifs in H3.3-established open chromatin regions.
