# Supplementary material for: Histone H3.3 deposition in seed is essential for the post-embryonic developmental competence in Arabidopsis
Source: PubMed Central journal article supplement (PMC9747979; doi:10.1038/s41467-022-35509-6), 2022-12-13
Supplement: 41467_2022_35509_MOESM8_ESM.pdf [file 41467_2022_35509_MOESM8_ESM.pdf]

## Reporting Summary

Nature Portfolio wishes to improve the reproducibility of the work that we publish. This form provides structure for consistency and transparency in reporting. For further information on Nature Portfolio policies, see our [Editorial Policies](#) and the [Editorial Policy Checklist](#).

### Statistics

For all statistical analyses, confirm that the following items are present in the figure legend, table legend, main text, or Methods section.

n/a Confirmed

- The exact sample size ( $n$ ) for each experimental group/condition, given as a discrete number and unit of measurement
- A statement on whether measurements were taken from distinct samples or whether the same sample was measured repeatedly
- The statistical test(s) used AND whether they are one- or two-sided  
*Only common tests should be described solely by name; describe more complex techniques in the Methods section.*
- A description of all covariates tested
- A description of any assumptions or corrections, such as tests of normality and adjustment for multiple comparisons
- A full description of the statistical parameters including central tendency (e.g. means) or other basic estimates (e.g. regression coefficient) AND variation (e.g. standard deviation) or associated estimates of uncertainty (e.g. confidence intervals)
- For null hypothesis testing, the test statistic (e.g.  $F$ ,  $t$ ,  $r$ ) with confidence intervals, effect sizes, degrees of freedom and  $P$  value noted  
*Give  $P$  values as exact values whenever suitable.*
- For Bayesian analysis, information on the choice of priors and Markov chain Monte Carlo settings
- For hierarchical and complex designs, identification of the appropriate level for tests and full reporting of outcomes
- Estimates of effect sizes (e.g. Cohen's  $d$ , Pearson's  $r$ ), indicating how they were calculated

*Our web collection on [statistics for biologists](#) contains articles on many of the points above.*

### Software and code

Policy information about [availability of computer code](#)

Data collection

Data analysis March 2021

differentially enriched peaks, a common peak set was created by merging peaks in Col and h3.3ko, scores for open chromatin peak regions were calculated with deepTools utility multiBigwigSummary, and differential peaks were called by requiring more than two-fold difference and  $P$  adjust  $< 0.05$ . Genes were assigned to the peaks when the genic and 1kb upstream regions overlapped with the peak regions for at least one base pair. DNA motif analysis was performed with HOMER (version 4.11) using "findMotifs.pl".

#### BS-seq data analysis

Adapter trimming was performed and low-quality reads were filtered with fastp version 0.20.1. Reads were mapped to the Arabidopsis genome (TAIR10) with BS-Seeker2 version 2.1.8 using default parameters. Duplicated reads were filtered with Picard version 2.24.0 MarkDuplicates. CG, CHG, and CHH methylation levels were calculated with CGmappro (version 0.1.2). CG DMRs were called with CGmappro using dmr function with default parameters.

For manuscripts utilizing custom algorithms or software that are central to the research but not yet described in published literature, software must be made available to editors and reviewers. We strongly encourage code deposition in a community repository (e.g. GitHub). See the Nature Portfolio [guidelines for submitting code & software](#) for further information.

## Data

Policy information about [availability of data](#)

All manuscripts must include a [data availability statement](#). This statement should provide the following information, where applicable:

- Accession codes, unique identifiers, or web links for publicly available datasets
- A description of any restrictions on data availability
- For clinical datasets or third party data, please ensure that the statement adheres to our [policy](#)

The datasets generated during the current study are available in the GEO repository GSE209645. The private token for data access is olyfyiafrontkf. The ChIP-seq data of HTR5-GFP in seedlings were downloaded from GEO GSE167384.

## Human research participants

Policy information about [studies involving human research participants and Sex and Gender in Research](#).

### Reporting on sex and gender

*Use the terms sex (biological attribute) and gender (shaped by social and cultural circumstances) carefully in order to avoid confusing both terms. Indicate if findings apply to only one sex or gender; describe whether sex and gender were considered in study design whether sex and/or gender was determined based on self-reporting or assigned and methods used. Provide in the source data disaggregated sex and gender data where this information has been collected, and consent has been obtained for sharing of individual-level data; provide overall numbers in this Reporting Summary. Please state if this information has not been collected. Report sex- and gender-based analyses where performed, justify reasons for lack of sex- and gender-based analysis.*

### Population characteristics

*Describe the covariate-relevant population characteristics of the human research participants (e.g. age, genotypic information, past and current diagnosis and treatment categories). If you filled out the behavioural & social sciences study design questions and have nothing to add here, write "See above."*

### Recruitment

*Describe how participants were recruited. Outline any potential self-selection bias or other biases that may be present and how these are likely to impact results.*

### Ethics oversight

*Identify the organization(s) that approved the study protocol.*

Note that full information on the approval of the study protocol must also be provided in the manuscript.

## Field-specific reporting

Please select the one below that is the best fit for your research. If you are not sure, read the appropriate sections before making your selection.

Life sciences  Behavioural & social sciences  Ecological, evolutionary & environmental sciences

For a reference copy of the document with all sections, see [nature.com/documents/nr-reporting-summary-flat.pdf](https://www.nature.com/documents/nr-reporting-summary-flat.pdf)

## Life sciences study design

All studies must disclose on these points even when the disclosure is negative.

|                 |                                                                                                                                                       |
|-----------------|-------------------------------------------------------------------------------------------------------------------------------------------------------|
| Sample size     | No sample size calculation was performed                                                                                                              |
| Data exclusions | No data exclusion                                                                                                                                     |
| Replication     | Three replicates were performed for RNA-seq, RT-qPCR, ChIP-qPCR and germination test. Two replicates were performed for ChIP-seq, ATAC-seq and BS-seq |
| Randomization   | For all examples, samples were imbibed side by side, each replicate on separate plate                                                                 |

## Reporting for specific materials, systems and methods

We require information from authors about some types of materials, experimental systems and methods used in many studies. Here, indicate whether each material, system or method listed is relevant to your study. If you are not sure if a list item applies to your research, read the appropriate section before selecting a response.

### Materials & experimental systems

| n/a                                 | Involvement in the study                               |
|-------------------------------------|--------------------------------------------------------|
| <input type="checkbox"/>            | <input checked="" type="checkbox"/> Antibodies         |
| <input checked="" type="checkbox"/> | <input type="checkbox"/> Eukaryotic cell lines         |
| <input checked="" type="checkbox"/> | <input type="checkbox"/> Palaeontology and archaeology |
| <input checked="" type="checkbox"/> | <input type="checkbox"/> Animals and other organisms   |
| <input checked="" type="checkbox"/> | <input type="checkbox"/> Clinical data                 |
| <input checked="" type="checkbox"/> | <input type="checkbox"/> Dual use research of concern  |

### Methods

| n/a                                 | Involvement in the study                        |
|-------------------------------------|-------------------------------------------------|
| <input type="checkbox"/>            | <input checked="" type="checkbox"/> ChIP-seq    |
| <input checked="" type="checkbox"/> | <input type="checkbox"/> Flow cytometry         |
| <input checked="" type="checkbox"/> | <input type="checkbox"/> MRI-based neuroimaging |

## Antibodies

Antibodies used

anti-GFP (Thermo Fisher Scientific, A-11122), anti-H2A.Z (Yelagandula et al., 2014), anti-Pol II (abcam, ab26721)

Validation

anti-GFP (Thermo Fisher Scientific, A-11122): <https://www.thermofisher.cn/cn/zh/antibody/product/GFP-Antibody-Polyclonal/A-11122>  
 anti-H2A.Z (Yelagandula et al., 2014): doi: 10.1016/j.cell.2014.06.006  
 anti-Pol II (abcam, ab26721): <https://www.abcam.com/RNA-polymerase-II-CTD-repeat-YSPTSPS-antibody-ChIP-Grade-ab26721.html>

## ChIP-seq

### Data deposition

- Confirm that both raw and final processed data have been deposited in a public database such as [GEO](#).
- Confirm that you have deposited or provided access to graph files (e.g. BED files) for the called peaks.

Data access links

*May remain private before publication.*<https://www.ncbi.nlm.nih.gov/geo/query/acc.cgi?acc=GSE209645>

Files in database submission

ChIP-seq  
 HTR5-GFP\_G24h\_1\_input\_R1.fq.gz  
 HTR5-GFP\_G24h\_2\_input\_R1.fq.gz  
 HTR5-GFP\_MS\_1\_input\_R1.fq.gz  
 HTR5-GFP\_MS\_2\_input\_R1.fq.gz  
 HTR5-GFP\_S48h\_1\_input\_R1.fq.gz  
 HTR5-GFP\_S48h\_2\_input\_R1.fq.gz  
 HTR5-GFP\_G24h\_1\_GFP\_IP\_R1.fq.gz  
 HTR5-GFP\_G24h\_2\_GFP\_IP\_R1.fq.gz  
 HTR5-GFP\_MS\_1\_GFP\_IP\_R1.fq.gz  
 HTR5-GFP\_MS\_2\_GFP\_IP\_R1.fq.gz  
 HTR5-GFP\_S48h\_1\_GFP\_IP\_R1.fq.gz  
 HTR5-GFP\_S48h\_2\_GFP\_IP\_R1.fq.gz  
 HTR5-GFP\_MS\_1\_H2A.Z\_IP\_R1.fq.gz  
 HTR5-GFP\_MS\_2\_H2A.Z\_IP\_R1.fq.gz  
 HTR5-GFP\_G24h\_1\_input\_R2.fq.gz  
 HTR5-GFP\_G24h\_2\_input\_R2.fq.gz  
 HTR5-GFP\_MS\_1\_input\_R2.fq.gz  
 HTR5-GFP\_MS\_2\_input\_R2.fq.gz  
 HTR5-GFP\_S48h\_1\_input\_R2.fq.gz  
 HTR5-GFP\_S48h\_2\_input\_R2.fq.gz  
 HTR5-GFP\_G24h\_1\_GFP\_IP\_R2.fq.gz  
 HTR5-GFP\_G24h\_2\_GFP\_IP\_R2.fq.gz  
 HTR5-GFP\_MS\_1\_GFP\_IP\_R2.fq.gz  
 HTR5-GFP\_MS\_2\_GFP\_IP\_R2.fq.gz  
 HTR5-GFP\_S48h\_1\_GFP\_IP\_R2.fq.gz  
 HTR5-GFP\_S48h\_2\_GFP\_IP\_R2.fq.gz

HTR5-GFP\_MS\_1\_H2A.Z\_IP\_R2.fq.gz  
HTR5-GFP\_MS\_2\_H2A.Z\_IP\_R2.fq.gz  
HTR5-GFP\_MS\_1\_input.bw  
HTR5-GFP\_MS\_2\_input.bw  
HTR5-GFP\_S48h\_1\_input.bw  
HTR5-GFP\_S48h\_2\_input.bw  
HTR5-GFP\_G24h\_1\_input.bw  
HTR5-GFP\_G24h\_2\_input.bw  
HTR5-GFP\_MS\_1\_GFP\_IP.bw  
HTR5-GFP\_MS\_2\_GFP\_IP.bw  
HTR5-GFP\_S48h\_1\_GFP\_IP.bw  
HTR5-GFP\_S48h\_2\_GFP\_IP.bw  
HTR5-GFP\_G24h\_1\_GFP\_IP.bw  
HTR5-GFP\_G24h\_2\_GFP\_IP.bw  
HTR5-GFP\_MS\_1\_H2A.Z\_IP.bw  
HTR5-GFP\_MS\_2\_H2A.Z\_IP.bw  
ATAC-seq (h3.3ko)  
Col\_G24h\_1\_R1.fq.gz  
Col\_G24h\_2\_R1.fq.gz  
Col\_MS\_1\_R1.fq.gz  
Col\_MS\_2\_R1.fq.gz  
Col\_S48h\_1\_R1.fq.gz  
Col\_S48h\_2\_R1.fq.gz  
Col\_Seedling\_1\_R1.fq.gz  
Col\_Seedling\_2\_R1.fq.gz  
h3.3ko\_MS\_1\_R1.fq.gz  
h3.3ko\_MS\_2\_R1.fq.gz  
Col\_G24h\_1\_R2.fq.gz  
Col\_G24h\_2\_R2.fq.gz  
Col\_MS\_1\_R2.fq.gz  
Col\_MS\_2\_R2.fq.gz  
Col\_S48h\_1\_R2.fq.gz  
Col\_S48h\_2\_R2.fq.gz  
Col\_Seedling\_1\_R2.fq.gz  
Col\_Seedling\_2\_R2.fq.gz  
h3.3ko\_MS\_1\_R2.fq.gz  
h3.3ko\_MS\_2\_R2.fq.gz  
h3.3ko\_G24h\_1\_R1.fq.gz  
h3.3ko\_G24h\_1\_R2.fq.gz  
h3.3ko\_G24h\_2\_R1.fq.gz  
h3.3ko\_G24h\_2\_R2.fq.gz  
Col\_MS\_1.bw  
Col\_MS\_2.bw  
Col\_S48h\_1.bw  
Col\_S48h\_2.bw  
Col\_G24h\_1.bw  
Col\_G24h\_2.bw  
Col\_Seedling\_1.bw  
Col\_Seedling\_2.bw  
h3.3ko\_MS\_1.bw  
h3.3ko\_MS\_2.bw  
h3.3ko\_G24h\_1.bw  
h3.3ko\_G24h\_2.bw  
Accessibility\_decreased\_in\_h3.3ko.bed  
Accessibility\_increased\_in\_h3.3ko.bed  
ATAC-seq (h2a.z)  
Col\_MS\_1\_R1.fq.gz  
Col\_MS\_1\_R2.fq.gz  
Col\_MS\_2\_R1.fq.gz  
Col\_MS\_2\_R2.fq.gz  
h2a.z\_MS\_1\_R1.fq.gz  
h2a.z\_MS\_1\_R2.fq.gz  
h2a.z\_MS\_2\_R1.fq.gz  
h2a.z\_MS\_2\_R2.fq.gz  
Col\_MS\_1.bw  
Col\_MS\_2.bw  
h2a.z\_MS\_1.bw  
h2a.z\_MS\_2.bw

Genome browser session  
(e.g. [UCSC](#))

Provide a link to an anonymized genome browser session for "Initial submission" and "Revised version" documents only, to enable peer review. Write "no longer applicable" for "Final submission" documents.

## Methodology

|                         |                                                                                                                                                                                                                                                                                                                                                                                                                                                                                                                                                                                                                                                                                                                                                                                                                                                                                                                                                                                                                                                                                         |
|-------------------------|-----------------------------------------------------------------------------------------------------------------------------------------------------------------------------------------------------------------------------------------------------------------------------------------------------------------------------------------------------------------------------------------------------------------------------------------------------------------------------------------------------------------------------------------------------------------------------------------------------------------------------------------------------------------------------------------------------------------------------------------------------------------------------------------------------------------------------------------------------------------------------------------------------------------------------------------------------------------------------------------------------------------------------------------------------------------------------------------|
| Replicates              | ATAC-seq: two replicates<br>HTR5-GFP ChIP-seq: two replicates<br>H2A.Z ChIP-seq: two replicates                                                                                                                                                                                                                                                                                                                                                                                                                                                                                                                                                                                                                                                                                                                                                                                                                                                                                                                                                                                         |
| Sequencing depth        | All sequencing reads are paired-end 150bp, listed are the numbers of uniquely mapped reads<br>ChIP-seq<br>HTR5-GFP_MS_1_input 10,310,971<br>HTR5-GFP_MS_2_input 8,658,993<br>HTR5-GFP_MS_1_GFP_IP 11,717,702<br>HTR5-GFP_MS_2_GFP_IP 5,932,850<br>HTR5-GFP_MS_1_H2A.Z_IP 25,970,238<br>HTR5-GFP_MS_2_H2A.Z_IP 31,166,506<br>HTR5-GFP_S48h_1_input 7,596,469<br>HTR5-GFP_S48h_2_input 13,465,070<br>HTR5-GFP_S48h_1_GFP_IP 8,036,824<br>HTR5-GFP_S48h_2_GFP_IP 9,416,504<br>HTR5-GFP_G24h_1_input 10,607,918<br>HTR5-GFP_G24h_2_input 12,504,971<br>HTR5-GFP_G24h_1_GFP_IP 10,861,953<br>HTR5-GFP_G24h_2_GFP_IP 9,025,282<br>ATAC-seq (h3.3ko)<br>Col_MS_1 10,308,725<br>Col_MS_2 15,788,642<br>Col_S48h_1 16,907,549<br>Col_S48h_2 14,210,358<br>Col_G24h_1 12,656,074<br>Col_G24h_2 10,503,110<br>Col_Seedling_1 10,672,105<br>Col_Seedling_2 9,847,754<br>h3.3ko_MS_1 11,563,748<br>h3.3ko_MS_2 11,702,975<br>h3.3ko_G24h_1 17,519,596<br>h3.3ko_G24h_2 16,846,128<br>ATAC-seq (h2a.z)<br>Col_MS_1 7,213,265<br>Col_MS_2 11,247,954<br>h2a.z_MS_1 11,146,880<br>h2a.z_MS_2 13,746,335 |
| Antibodies              | anti-GFP (Thermo Fisher Scientific, A-11122), anti-H2A.Z (Yelagandula et al., 2014)                                                                                                                                                                                                                                                                                                                                                                                                                                                                                                                                                                                                                                                                                                                                                                                                                                                                                                                                                                                                     |
| Peak calling parameters | <pre>system('cat call_peak.txt   while read id; do sample_name=\${id%.re*}; ~/anaconda2/bin/macs2 callpeak -t \$id -f BAMPE -g 1.2e8 -q 0.01 --max-gap 150 --call-summits -n \${sample_name} 2&gt; \${sample_name}.log"; done') system('cat call_peak.txt   while read id1 id2; do sample_name1=\${id1%.*}; sample_name2=\${id2%.*}; ~/anaconda2/bin/macs2 callpeak -t \$id1 -c \$id2 --broad --broad-cutoff 0.05 -f BAMPE -g 1.2e8 -n \${sample_name1}"vs"\${sample_name2} 2&gt; \${sample_name1}"vs"\${sample_name2}.log"; done')</pre>                                                                                                                                                                                                                                                                                                                                                                                                                                                                                                                                               |
| Data quality            | ATAC-seq<br>Col_MS_1: 7225 peaks<br>Col_MS_2: 11269 peaks<br>h3.3ko_MS_1: 14356 peaks<br>h3.3ko_MS_2: 17189 peaks<br>ChIP-seq<br>HTR5-GFP_MS_1 (anti-GFP): 14741 peaks<br>HTR5-GFP_MS_2 (anti-GFP): 11904 peaks<br>Only peaks identified from both biological replicates were kept.                                                                                                                                                                                                                                                                                                                                                                                                                                                                                                                                                                                                                                                                                                                                                                                                     |
| Software                | fastp version 0.20.1<br>Botiew2 version 2.4.2<br>Picard version 2.24.0<br>SAMtools version 1.9<br>MACS2 version 2.1.2                                                                                                                                                                                                                                                                                                                                                                                                                                                                                                                                                                                                                                                                                                                                                                                                                                                                                                                                                                   |
